# Supplementary material for: Major Histocompatibility Complex Class II (DRB3) Genetic Diversity in Spanish Morucha and Colombian Normande Cattle Compared to Taurine and Zebu Populations
Source: Front Genet. 2020 Jan 10;10:1293. doi: 10.3389/fgene.2019.01293 (PMC6965167; doi:10.3389/fgene.2019.01293)
Supplement: Supplementary file 3 [file DataSheet_3.xlsx]

## Sheet: Hoja1
Matrix of pairwise Fst values between populations
	Cc_Nor	Cb_Nor	Cn_Nor	Sp_Mor	Bo_Nel	Bo_Gir	Pe_Ne-Br	Ar_Ho	Bo_Ho	Pa_Ho	Pe_Ho	Ch_Ho	Ch_He	Ch_H-J	Ch_Wa	Bo_Yac	C_HdV	Ja_Ho	Ja_Sh	Ja_Je	Ja_Bl
Cc_Nor	0.00000	0.00622	0.00423	0.00725	0.01787	0.00528	0.02460	0.03986	0.02049	0.05129	0.05344	0.08558	0.09120	0.04358	0.03118	0.04564	0.09385	0.03736	0.06556	0.11004	0.10377
Cb_Nor	0.00622	0.00000	0.00436	0.00467	0.01861	0.00136	0.03474	0.05174	0.03415	0.05473	0.04106	0.09143	0.09529	0.04981	0.03725	0.04807	0.10423	0.04257	0.06427	0.11312	0.10711
Cn_Nor	0.00423	0.00436	0.00000	-0.00103	0.01770	0.00589	0.03329	0.05505	0.03769	0.05686	0.04942	0.09157	0.10229	0.05531	0.03668	0.05415	0.10030	0.04275	0.05763	0.11783	0.11213
Sp_Mor	0.00725	0.00467	-0.00103	0.00000	0.01219	0.00540	0.02923	0.05558	0.03498	0.05183	0.04303	0.09161	0.09960	0.05164	0.03346	0.04934	0.09635	0.04549	0.05185	0.11314	0.10462
Bo_Nel	0.01787	0.01861	0.01770	0.01219	0.00000	0.01936	0.02938	0.06201	0.03822	0.05996	0.05444	0.08532	0.09802	0.05402	0.02912	0.04811	0.10259	0.04205	0.05898	0.10742	0.08956
Bo_Gir	0.00528	0.00136	0.00589	0.00540	0.01936	0.00000	0.03095	0.04275	0.02693	0.04288	0.03673	0.07856	0.08682	0.04256	0.03097	0.04442	0.09025	0.03788	0.06039	0.10468	0.09803
Pe_Ne-Br	0.02460	0.03474	0.03329	0.02923	0.02938	0.03095	0.00000	0.05365	0.01294	0.05048	0.05957	0.07711	0.08175	0.04170	0.02752	0.01487	0.07306	0.04092	0.07025	0.09844	0.09995
Ar_Ho	0.03986	0.05174	0.05505	0.05558	0.06201	0.04275	0.05365	0.00000	0.02573	0.03860	0.06233	0.05693	0.07715	0.04734	0.04053	0.06259	0.09870	0.06372	0.07884	0.10750	0.10681
Bo_Ho	0.02049	0.03415	0.03769	0.03498	0.03822	0.02693	0.01294	0.02573	0.00000	0.02687	0.04406	0.05354	0.06627	0.03892	0.02573	0.02421	0.07589	0.03933	0.06391	0.08423	0.09965
Pa_Ho	0.05129	0.05473	0.05686	0.05183	0.05996	0.04288	0.05048	0.03860	0.02687	0.00000	0.03876	0.03064	0.04272	0.03698	0.02024	0.04370	0.07538	0.04846	0.05380	0.08175	0.09126
Pe_Ho	0.05344	0.04106	0.04942	0.04303	0.05444	0.03673	0.05957	0.06233	0.04406	0.03876	0.00000	0.07598	0.08735	0.05577	0.04642	0.06141	0.10115	0.05994	0.06115	0.10775	0.11246
Ch_Ho	0.08558	0.09143	0.09157	0.09161	0.08532	0.07856	0.07711	0.05693	0.05354	0.03064	0.07598	0.00000	0.05221	0.06855	0.05758	0.07401	0.10084	0.06829	0.08475	0.10201	0.11723
Ch_He	0.09120	0.09529	0.10229	0.09960	0.09802	0.08682	0.08175	0.07715	0.06627	0.04272	0.08735	0.05221	0.00000	0.05504	0.05663	0.07563	0.11098	0.08126	0.08850	0.11297	0.12362
Ch_H-J	0.04358	0.04981	0.05531	0.05164	0.05402	0.04256	0.04170	0.04734	0.03892	0.03698	0.05577	0.06855	0.05504	0.00000	0.02385	0.04169	0.06947	0.04486	0.06243	0.09741	0.09398
Ch_Wa	0.03118	0.03725	0.03668	0.03346	0.02912	0.03097	0.02752	0.04053	0.02573	0.02024	0.04642	0.05758	0.05663	0.02385	0.00000	0.03052	0.06128	0.03203	0.04811	0.07917	0.07422
Bo_Yac	0.04564	0.04807	0.05415	0.04934	0.04811	0.04442	0.01487	0.06259	0.02421	0.04370	0.06141	0.07401	0.07563	0.04169	0.03052	0.00000	0.06776	0.04323	0.07362	0.09488	0.10688
C_HdV	0.09385	0.10423	0.10030	0.09635	0.10259	0.09025	0.07306	0.09870	0.07589	0.07538	0.10115	0.10084	0.11098	0.06947	0.06128	0.06776	0.00000	0.07201	0.08949	0.12388	0.13382
Ja_Ho	0.03736	0.04257	0.04275	0.04549	0.04205	0.03788	0.04092	0.06372	0.03933	0.04846	0.05994	0.06829	0.08126	0.04486	0.03203	0.04323	0.07201	0.00000	0.04411	0.06111	0.07737
Ja_Sh	0.06556	0.06427	0.05763	0.05185	0.05898	0.06039	0.07025	0.07884	0.06391	0.05380	0.06115	0.08475	0.08850	0.06243	0.04811	0.07362	0.08949	0.04411	0.00000	0.06369	0.07537
Ja_Je	0.11004	0.11312	0.11783	0.11314	0.10742	0.10468	0.09844	0.10750	0.08423	0.08175	0.10775	0.10201	0.11297	0.09741	0.07917	0.09488	0.12388	0.06111	0.06369	0.00000	0.05111
Ja_Bl	0.10377	0.10711	0.11213	0.10462	0.08956	0.09803	0.09995	0.10681	0.09965	0.09126	0.11246	0.11723	0.12362	0.09398	0.07422	0.10688	0.13382	0.07737	0.07537	0.05111	0.00000
